# Supplementary material for: JAK/STAT guarantees robust neural stem cell differentiation by shutting off biological noise
Source: PubMed Central journal article supplement (PMC6102247; doi:10.1038/s41598-018-30929-1), 2018-08-20
Supplement: 41598_2018_30929_MOESM1_ESM.pdf [file 41598_2018_30929_MOESM1_ESM.pdf]

**JAK/STAT guarantees robust neural stem cell differentiation  
by shutting off biological noise**

**Authors**

Yoshitaro Tanaka, Tetsuo Yasugi, Masaharu Nagayama, Makoto Sato, and  
Shin-Ichiro Ei

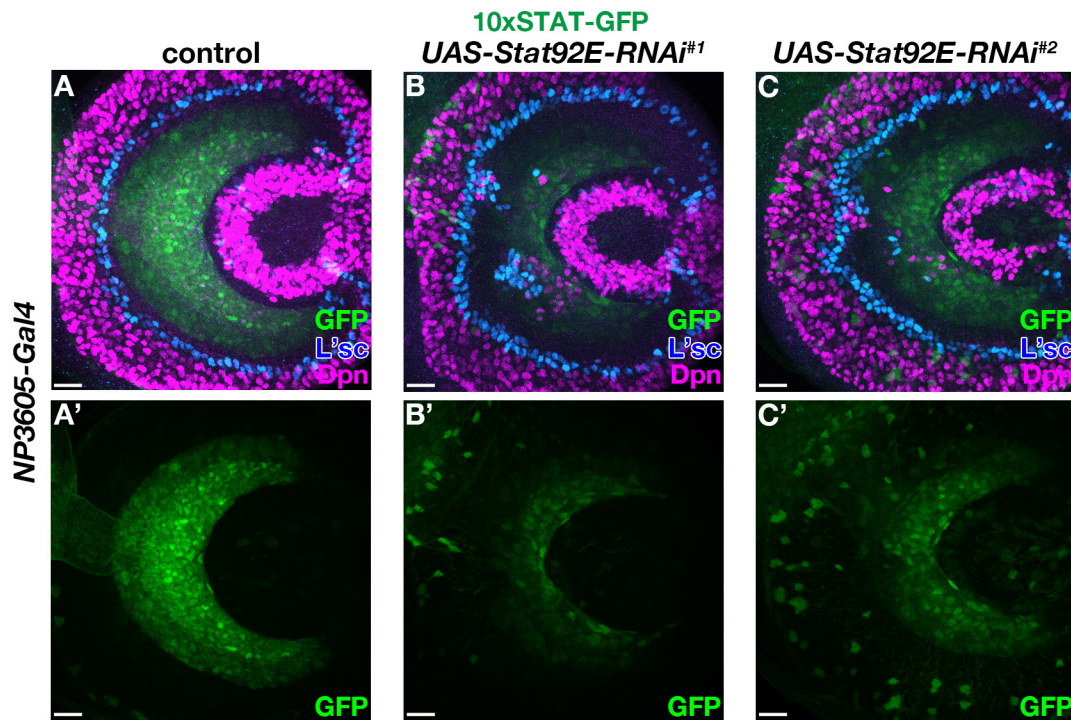

**Figure S1. *Stat92E* RNAi reduces the activity of JAK/STAT signaling uniformly.** (A-C') Third-instar larval optic lobes for control (A), *UAS-Stat92E-RNAi<sup>#1</sup>* (B), and *UAS-Stat92E-RNAi<sup>#2</sup>* (C). *NP3605-Gal4* was used as a *Gal4* driver. 10xSTAT-GFP (green), L'sc (blue) and Dpn (magenta) are shown. (A', B', and C') 10xSTAT-GFP is shown. Scale bars. 20  $\mu$ m.

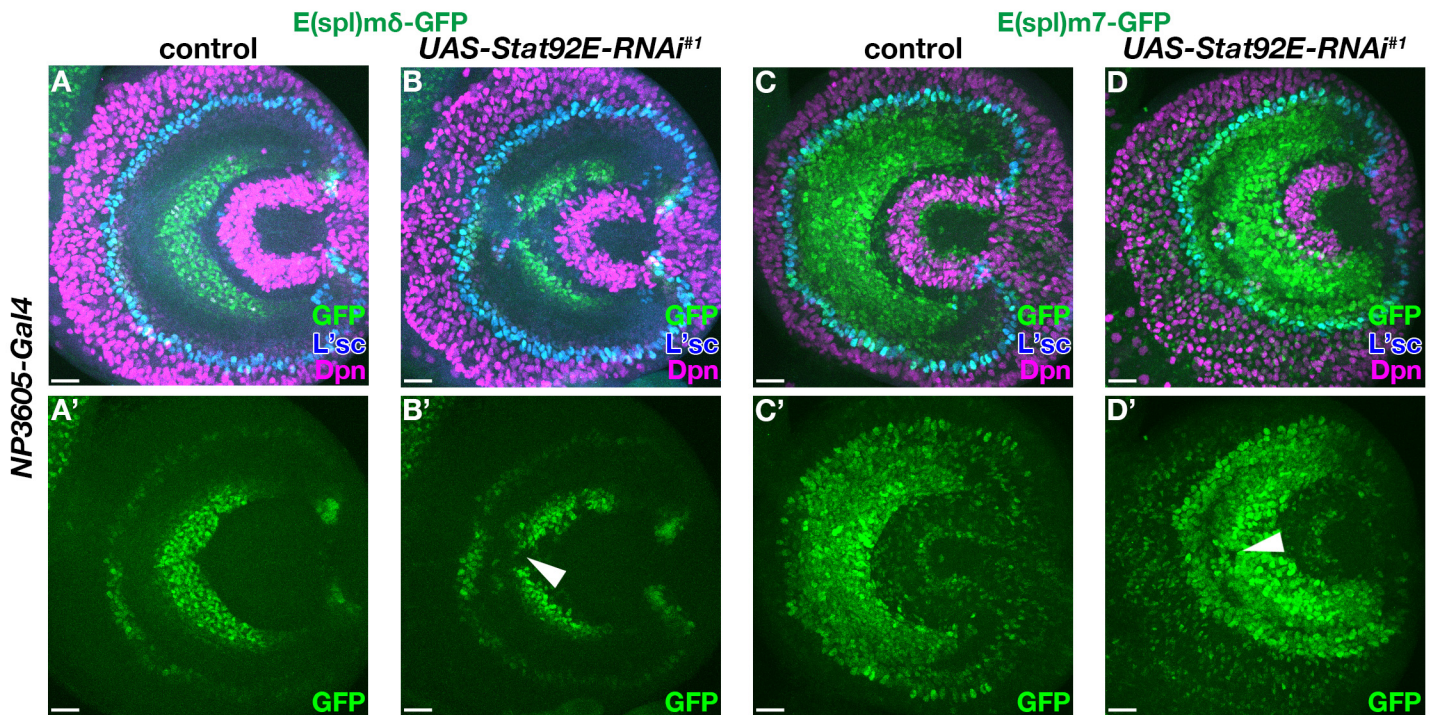

**Figure S2. *Stat92E* RNAi reduces the activity of JAK/STAT signaling uniformly.** (A-B') Third-instar larval optic lobes for control (A) and *UAS-Stat92E-RNAi<sup>#1</sup>* (B). *E(spl)mδ-GFP* (green), *L'sc* (blue) and *Dpn* (magenta) are shown. (A' and B') *E(spl)mδ-GFP* is shown. (C-D') Third-instar larval optic lobes for control (C) and *UAS-Stat92E-RNAi<sup>#1</sup>* (D). *E(spl)m7-GFP* (green), *L'sc* (blue) and *Dpn* (magenta) are shown. (C' and D') *E(spl)m7-GFP* is shown. *NP3605-Gal4* was used as a *Gal4* driver. White arrowheads in (B') and (D') indicate the decrease of GFP expression. Scale bars, 20  $\mu$ m.
